# Supplementary material for: Arranged redistribution of sulfur species and synergistic mediation of polysulfide conversion in lithium–sulfur batteries by a cactus structure MnO2/carbon nanofiber interlayer
Source: Royal Society of Chemistry journal article supplement (doi:10.1039/c9qm00022d), 2019-01-01
Supplement: c9qm00022d1.pdf [file c9qm00022d1.pdf]

## Experimental

### Materials

3,3',4,4'-biphenyl tetracarboxylic dianhydride (BPDA, >99.5%, Changzhou Sun Chem Chemical Co., Ltd.), p-phenylenediamine (PPD, >99%, Wuxi Changan Fine Chemical Factory), N,N-dimethylformamide (DMF) (Xilong Chemical Co., Ltd), potassium permanganate (KMnO<sub>4</sub>, Sigma-Aldrich), lithium sulfide (Li<sub>2</sub>S, 99.9%, Sigma-Aldrich) and sulfur (S, 99.5%, Aladdin Co. Ltd.) were used as received.

### Preparation of MnO<sub>2</sub>/N-rich CNF

BPDA and PPD (with a molar ratio of 1.05:1) were added to DMF in sequence to get a 13 wt% electrospinning solution. The blended solution was stirred at 0 °C for 12 hours. Electrospinning parameters were set as follows: applied voltage of 20-25 kV, tip-to-collector distance of 25 cm and flow rate of 0.8 ml h<sup>-1</sup>. As-spun fibers were heated in a horizontal tubular furnace. Temperature of the furnace was first increased from room temperature to 250 °C at the rate of 5 °C min<sup>-1</sup> and maintained for 0.5 hour in air flow. Then the temperature was increased to 370 °C at the rate of 1 °C min<sup>-1</sup> and maintained for 0.5 hour. Then the temperature was increased to 400 °C at the rate of 1 °C min<sup>-1</sup> and maintained for 0.5 hour for imidization. Then the temperature of the furnace was increased to 900 °C at the rate of 5 °C min<sup>-1</sup> and maintained for 1 hour under N<sub>2</sub> atmosphere for carbonization.

The MnO<sub>2</sub>/CNF composites were synthesized by a one-step facile redox method. In brief, 40 mg as-prepared CNF after a plasma treatment was soaked in 400 ml deionized (DI) water. Then 10 mg KMnO<sub>4</sub> was added and stirred until completely dissolved. After heating in a thermostatic oven at 80°C for 24 h, the composites were washed with DI water and air-dried.

### Characterizations

The morphology of MnO<sub>2</sub>/CNF was observed by SU-8010 scanning electron microscope (SEM). Transmission electron microscopy (TEM) was performed on a JEM-2100F TEM/STEM operating at 200 keV. X-ray diffraction (XRD) analysis was performed using D/MAX-RM 2000 at a scanning rate of 5° min<sup>-1</sup> in a range of diffraction angle 2θ from 10° to 80°. Raman spectra were performed by HORIBA LabRAM HR Evolution with an excitation laser beam with wavelength of 532 nm. X-ray photoelectron

spectroscopy (XPS) measurement was investigated using a thermo ESCALAB 250 spectrometer. And XPS data was analyzed with Thermo Advantage software. The binding energy values were calibrated to the C 1s peak at 284.8 eV. The specific surface area and pore-size distribution of the composites were conducted by an automatic adsorption system (Bellsorp-mini) from adsorption isotherms of N<sub>2</sub> at 77 K with the Brunauer-Emmett-Teller method and density functional theory model. The content of MnO<sub>2</sub> in the interlayer was obtained by Thermogravimetric analysis (TGA, Mettler TGA Q5000) at the rate of 5 °C min<sup>-1</sup> from 25 °C to 800 °C under air flow.

### Cell assembly and electrochemical measurements

Sulfur, super P and PVDF were dispersed homogeneously in NMP to form a slurry (S: super P: PVDF=6:3:1 in weight). The slurry was then cast onto Al foil to get a thin slice in a diameter of 12 mm. The sulfur loading of cathode was about 1.65 mg cm<sup>-2</sup>. All cells were assembled in a glove box with Ar atmosphere. CR2032-type coin cells were applied to perform the electrochemical experiments with lithium metal as the anode. Celgard 2400 membrane was utilized as the separator. The as-prepared MnO<sub>2</sub>/CNF was cut into wafers in a diameter of 16 mm as the interlayer between separator and cathode. DOL and DME by 1:1 in volume with 1M LiTFSI (lithium bistrifluoromethanesulfonylimide) and 0.1 M LiNO<sub>3</sub> were used as the electrolyte.

Galvanostatical charge-discharge measurements of batteries were carried out in voltage range from 1.7 to 2.8 V (vs. Li/Li<sup>+</sup>) by the Neware battery tester. A Chenhua electrochemical workstation CHI608E was employed to characterize the cyclic voltammetry (CV), electrochemical impedance spectroscopy (EIS) and voltammetric curves. CV tests were performed at a scan rate of 0.3 mV s<sup>-1</sup> in a voltage range of 1.5-3.0 V. EIS measurements were carried out at open-circuit potential in the frequency range between 100 kHz and 10 mHz with a perturbation amplitude of 5 mV. Stainless steel sheets were directly applied on both sides of CNF or MnO<sub>2</sub>/CNF membrane in cells to test voltammetric curves at a scan rate of 2 mV s<sup>-1</sup> in a voltage range of 0-2.0 V.

Li<sub>2</sub>S and S (in a 1:5 molar ratio) were added to a mixture of 1,2-dimethoxyethane (DME, 99.5%, Aladdin Co. Ltd., China) and 1,3-dioxolane (DOL, 99.8%, Aladdin Co. Ltd., China) (v/v, 1:1) with magnetic stirring in a glove box to synthesize a Li<sub>2</sub>S<sub>6</sub> solution (0.3M) for testing the diffusion process of polysulfides.

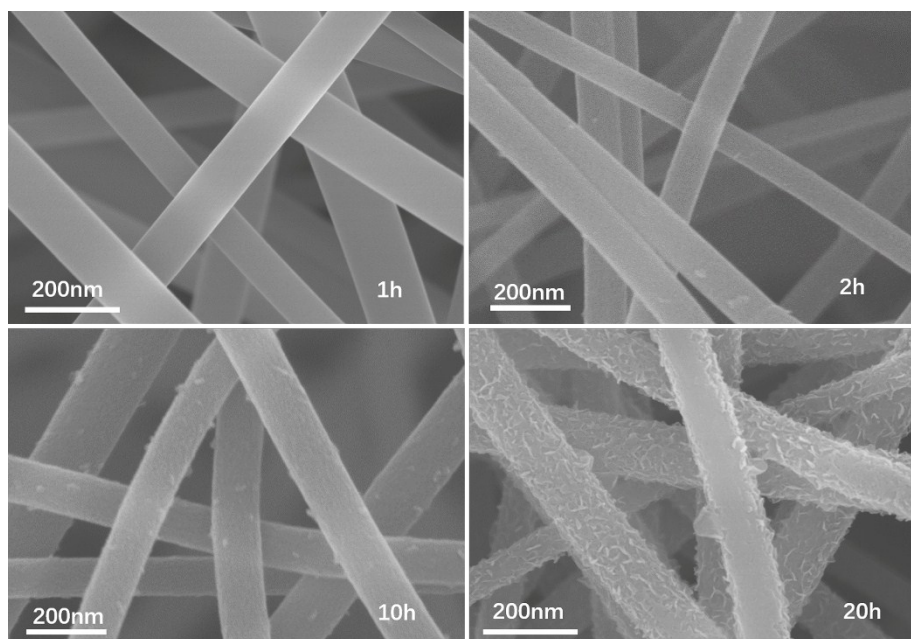

Fig. S1 The SEM images of the  $\text{MnO}_2/\text{CNF}$  after soaking in  $\text{KMnO}_4$  for different reaction time

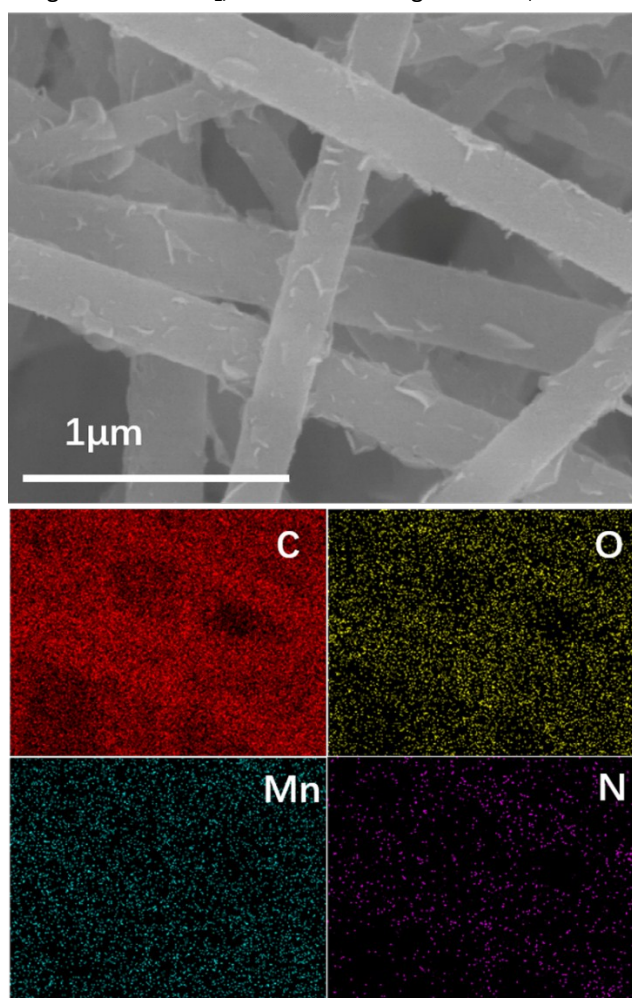

Fig. S2 Elements mapping of  $\text{MnO}_2/\text{CNF}$

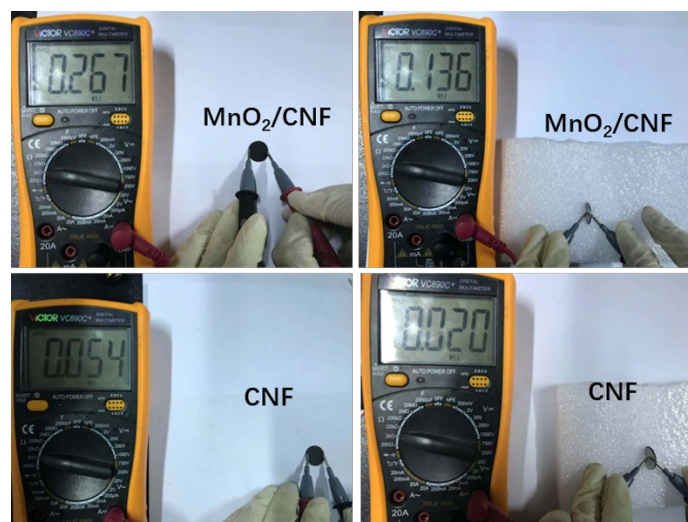

Fig. S3 Axial and radial resistance tests of CNF and  $\text{MnO}_2/\text{CNF}$  membrane

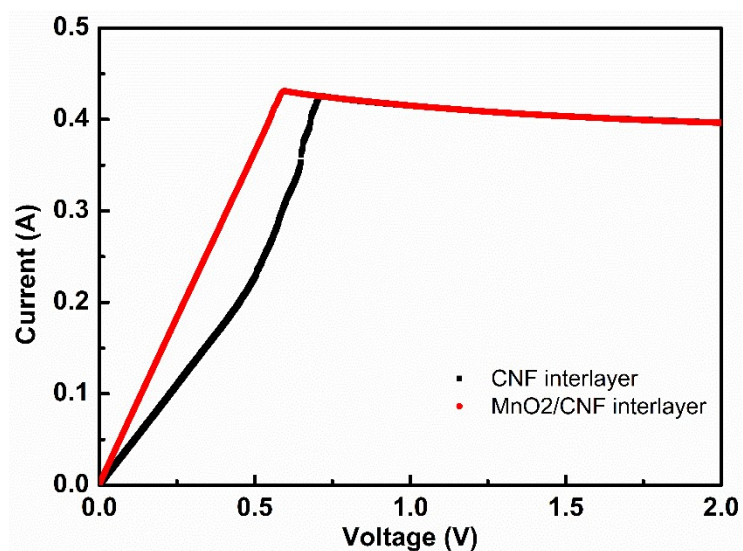

Fig. S4 Voltammetric curves of cells with CNF and  $\text{MnO}_2/\text{CNF}$  interlayer, without cathode and anode

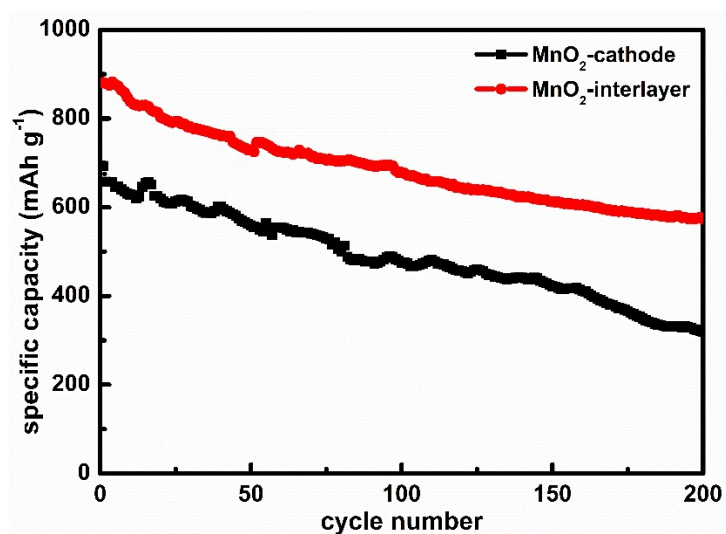

Fig. S5 Cycle performance of cells with  $\text{MnO}_2/\text{CNF}$  utilized as interlayer and cathode scaffold at 01C

Table S1. Potential gaps between corresponding reduction peaks and oxidation peaks in the CV curves in scan rate of  $0.3 \text{ mV s}^{-1}$  of different cells

|                              | Without interlayer | CNF interlayer | MnO <sub>2</sub> /CNF interlayer |
|------------------------------|--------------------|----------------|----------------------------------|
| The 1 <sup>st</sup> platform | 430 mV             | 380 mV         | 330 mV                           |
| The 2 <sup>nd</sup> platform | 600 mV             | 490 mV         | 480 mV                           |

Table S2. The area ratio of Mn of different peaks of the MnO<sub>2</sub>/CNF interlayer with and without Li<sub>2</sub>S<sub>6</sub> solution

|                | Mn( II ) | Mn( III ) | Mn( IV ) | Mn( II )* | Mn( III )* | Mn( IV )* |
|----------------|----------|-----------|----------|-----------|------------|-----------|
| Before soaking | 18.3%    | 32.5%     | 29.8%    | 11.7%     | 4.4%       | 3.3%      |
| After soaking  | 29.6%    | 31.4%     | 21.6%    | 10.6%     | 3.3%       | 3.5%      |

\* means different multiples
